# Supplementary material
Source: PubMed Central journal article supplement (PMC3928670)
Supplement: NIHMS553134-supplement-1_si_001.pdf [file NIHMS553134-supplement-1_si_001.pdf]

*Supporting Information for:*

## **Orchestration of Enzymatic Processing by Thiazole/Oxazole-Modified Microcin Dehydrogenases**

Joel O. Melby<sup>1,2</sup>, Xiangpo Li<sup>1,2</sup>, and Douglas A. Mitchell<sup>1-3\*</sup>

<sup>1</sup> Department of Chemistry, <sup>2</sup> Institute for Genomic Biology, and <sup>3</sup> Department of Microbiology; University of Illinois at Urbana-Champaign; Urbana, Illinois, 61801; USA

\*Corresponding author; Mitchell, Douglas A. ([douglasm@illinois.edu](mailto:douglasm@illinois.edu)), phone: 1-217-333-1345, fax: 1-217-333-0508)

|            |                                                                                        |
|------------|----------------------------------------------------------------------------------------|
| Table S1   | Oligonucleotides used in this study                                                    |
| Table S2   | Bioinformatic data for the dehydrogenases used in this study                           |
| Figure S1  | Dehydrogenase identity/similarity matrix and amino acid sequence of precursor peptides |
| Figure S2  | Three potential pathways for azole formation in ribosomal natural product biosynthesis |
| Figure S3  | The order of azole formation on BalhA1-5Tzn by CmsB and BamB                           |
| Figure S4  | Minimal requirement for dehydrogenase activity                                         |
| Figure S5  | Noncognate dehydrogenase activity towards BalhA1-5Tzn                                  |
| Figure S6  | TOMM dehydrogenase alignment                                                           |
| Figure S7  | Non-TOMM dehydrogenase crystal structure highlighting the Lys-Tyr motif                |
| Figure S8  | UV/Vis of dehydrogenases                                                               |
| Figure S9  | McbC-K201A and -Y202A lack dehydrogenase activity                                      |
| Figure S10 | Binding of BcerB-K185A/Y186A to BalhC/D                                                |
| Figure S11 | The reduction potential of McbC as measured by phenosafranine titration                |

| Oligonucleotide     | Sequence                                                            |
|---------------------|---------------------------------------------------------------------|
| CmsB f (BamHI)      | AAAAG <b><i>GATCC</i></b> ATGAGCACCATCGAGACCGACGC                   |
| CmsB r (NotI)       | AAAAG <b><i>CGGCCGCT</i></b> CAGTCATGGGAGGCCTCCTCGTC                |
| BamB f (BamHI)      | AAAAG <b><i>GATCC</i></b> ATGAAAGAGATTGAAAGGCATGCCACTAATTTGG        |
| BamB r (NotI)       | AAAAG <b><i>CGGCCGCT</i></b> CATGTTCTGCAACTAAAGTATATATAGGGGCATC     |
| SaciB f (Sall)      | AAAAG <b><i>TGACA</i></b> AATTGAATCCTTTTTGAGAGGTTTTATCTAGATAC       |
| SaciB r (NotI)      | AAAAG <b><i>CGGCCGCT</i></b> CATTCTCTCCCACTACCAA                    |
| BcerB-K185A f       | GCCAATCTTGATCAAACAAGTAGT <b><i>GCATACGC</i></b> CAGATAGGGGATATAAGTT |
| BcerB-K185A r       | AACTTATATCCCCTATCTGCGTAT <b><i>GCACTACT</i></b> TGTTTGATCAAGATTGGC  |
| BcerB-Y186A f       | CTGCCAATCTTGATCAAACAAGTAGTAAAG <b><i>CCGC</i></b> CAGATAGGGGATA     |
| BcerB-Y186A r       | TATCCCCTATCTG <b><i>CGGCT</i></b> TTACTACTTGTTTGATCAAGATTGGCAG      |
| SaciB-K173A f       | TTTACTGGAAGCCGATGGTT <b><i>GCATATG</i></b> GAAATAGAGGAGCCAG         |
| SaciB-K173A r       | CTGGCTCCTCTATTTCCATAT <b><i>GCA</i></b> ACCATCGGCTTCCAGTATAA        |
| SaciB-Y174A f       | CTTACTGGAAGCCGATGGTTAAAG <b><i>CT</i></b> GAAATAGAGGAGCCAG          |
| SaciB-Y174A r       | CTGGCTCCTCTATTTCC <b><i>AGCT</i></b> TTAACCATCGGCTTCCAGTATAAG       |
| BcerB-K185A/Y186A f | GCCAATCTTGATCAAACAAGTAGT <b><i>GCAGCCGC</i></b> CAGATAGGGGATA       |
| BcerB-K185A/Y186A r | TATCCCCTATCTG <b><i>CGGCTGC</i></b> ACTACTTGTTTGATCAAGATTGGC        |
| SaciB-K173A/Y174A f | TTACTGGAAGCCGATGGTT <b><i>GCAGCT</i></b> GAAATAGAGGAGCC             |
| SaciB-K173A/Y174A r | GGCTCCTCTATTTCC <b><i>AGCTGCA</i></b> ACCATCGGCTTCCAGTATA           |

**Table S1. Oligonucleotides used in this study.** The direction the primer binds the particular gene are described as forward (f) and reverse (r). The restriction site for primers used for cloning are provided in parenthesis, while the restriction sequence is bolded and italicized. Primers used for site-directed mutagenesis have the mutated codon(s) underlined.

| Dehydrogenase | Locus Tag       | GI number | Organism                                                   | %Identity/%Similarity to BalhB |
|---------------|-----------------|-----------|------------------------------------------------------------|--------------------------------|
| BcerB         | bcere0005_53170 | 228601410 | <i>Bacillus cereus</i> 172560W                             | 78/94                          |
| BamB          | RBAM_007480     | 154685203 | <i>Bacillus amyloliquefaciens</i> FZB42                    | 19/60                          |
| CmsB          | Cms_0547        | 170780985 | <i>Clavibacter michiganensis</i> subsp. <i>sepedonicus</i> | 16/51                          |
| McbC          | MCBC_ECOLX      | 126808    | <i>Escherichia coli</i>                                    | 16/59                          |
| PagB          | PF0001          | 18891897  | <i>Pyrococcus furiosus</i> DSM 3638                        | 21/61                          |
| SaciB         | Saci_0525       | 70606348  | <i>Sulfolobus acidocaldarius</i> DSM 639                   | 23/66                          |

**Table S2. Bioinformatic data for the dehydrogenases used in this study.** Shown are the dehydrogenase designations, along with their respective locus tags, GI numbers, producing organism, and percent identity/similarity to BalhB. The dehydrogenase responsible for microcin B17 biosynthesis (*E. coli*) was assigned a letter designation for its position within the biosynthetic gene cluster, not its function.

A

| Dehydrogenase | BalhB | BcerB | McbC | SagB | ClosB | BamB | CmsB | SaciB | PagB |
|---------------|-------|-------|------|------|-------|------|------|-------|------|
| BalhB         | 100   | 94    | 59   | 60   | 62    | 60   | 51   | 66    | 61   |
| BcerB         | 78    | 100   | 58   | 56   | 60    | 63   | 60   | 57    | 59   |
| McbC          | 16    | 12    | 100  | 61   | 61    | 60   | 62   | 52    | 56   |
| SagB          | 15    | 16    | 13   | 100  | 81    | 62   | 54   | 65    | 64   |
| ClosB         | 21    | 19    | 18   | 40   | 100   | 64   | 57   | 64    | 65   |
| BamB          | 19    | 17    | 13   | 23   | 19    | 100  | 65   | 66    | 65   |
| CmsB          | 16    | 20    | 17   | 16   | 17    | 34   | 100  | 65    | 62   |
| SaciB         | 23    | 19    | 15   | 25   | 24    | 28   | 20   | 100   | 68   |
| PagB          | 21    | 21    | 14   | 23   | 25    | 21   | 23   | 31    | 100  |

B

BalhA1 MEQKILDIKLTETGKINYAHKPDDSGCAGCMGCAGGTGCAGTGCIGQGVWKKCSGK  
 BalhA2 MEQKKSLEIKLTESGKIDYAHKPDDSGCAACIGTTSCGGVDPTKPGIWKRCSSK  
 BcerA MEQKKSLEIKLTESGKINYAHTPDSPGCAGGCVGTTSCTGVDPKPGVWQRCSGK  
 BamA MEEVTIMTQIKVPTALIASVHGEQHLFEPMAARCTCTTIISSSSTF  
 CmsA MESGAPAPLRTTATEVAPAAGDDASDALLAEAFGFTITHRGAEELVMGDVTLCCSTTCSSSGGGRQQR  
 McbA MELKASEFGVVLSDALKLSRQSPPLGVGIGGGGGGGGGSCGGQGGCGGCSNGCSGGNGGSGGSGSHI  
 PagA MVEGFKFEIFEYEEGPILPLDDDDPIIIACCCGGGGDNWKIFSTKPNP  
 SaciA MRAYYTVRRANLIYQAYSEGRVLFVWFGWFGWFGGGGRVSG

**Figure S1. Dehydrogenase identity/similarity matrix and amino acid sequence of precursor peptides.** **A.** Amino acid percent similarity (blue) and percent identity (green) matrix between dehydrogenases of interest to this study. ClustalW2 was used to calculate the pairwise identities and similarities.<sup>1</sup> **B.** Amino acid sequence of the cognate precursor peptide(s) for each dehydrogenase utilized in this study. Known residues to be cyclized *in vivo* or *in vitro* are colored red. Only the BalhA1 and McbA precursor peptides were used in this study.

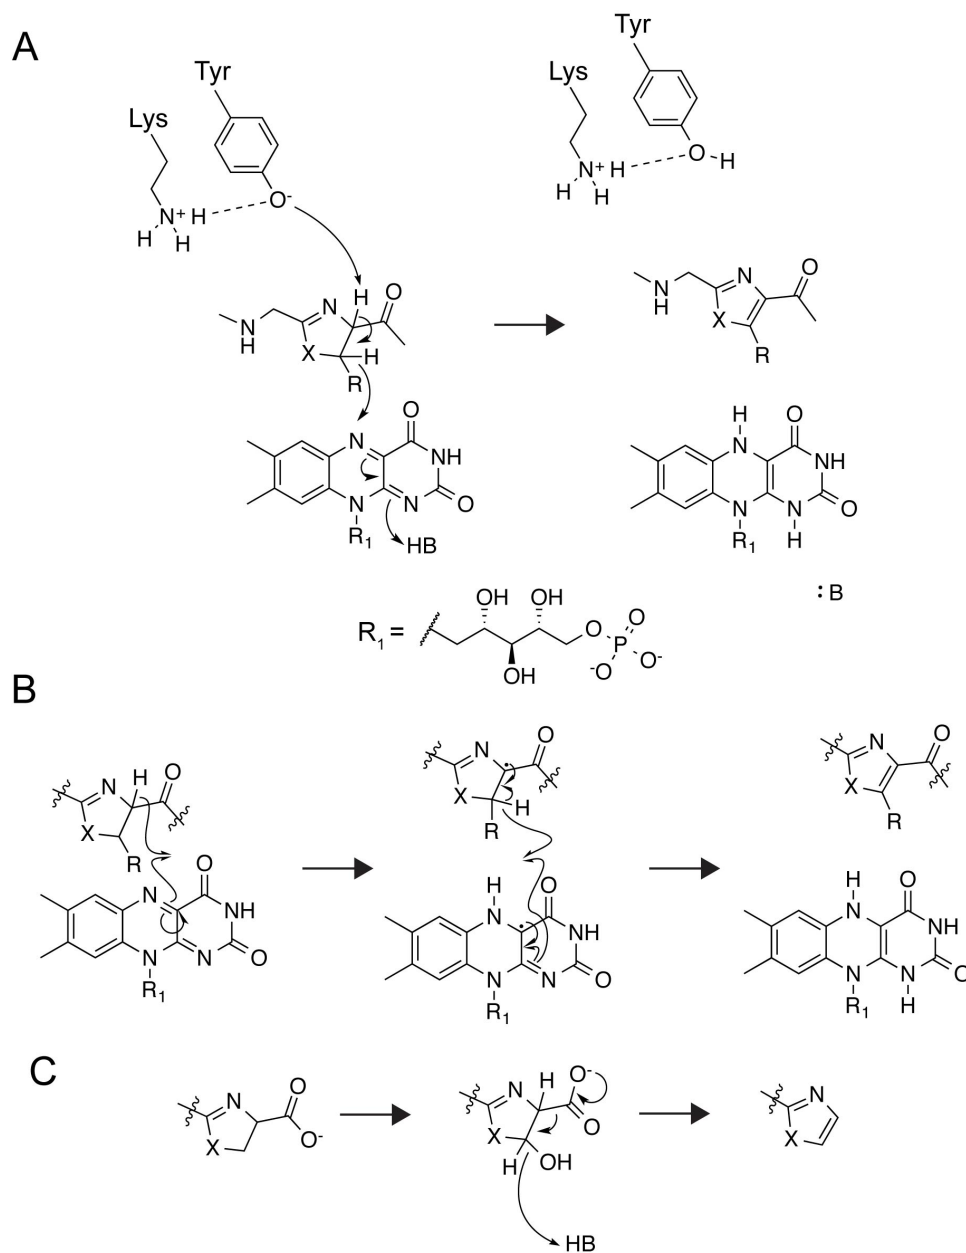

**Figure S2. Three potential pathways for azole formation in ribosomal natural product biosynthesis. A.** A possible polar mechanism for azoline dehydrogenation, which implicates the conserved Lys-Tyr motif in acid/base catalysis. **B.** Alternative radical mechanism for dehydrogenation that proceeds via a semiquinone radical intermediate. The data in this paper do not distinguish between the mechanisms drawn in panel A/B. **C.** Hypothesized oxidative decarboxylation mechanism for thiazole formation in the natural product bottromycin.<sup>2-4</sup> The bottromycin biosynthetic gene cluster lacks a bioinformatically identifiable TOMM dehydrogenase. Cys: X = S, R = H; Ser: X = O, R = H; Thr: X = O, R = CH<sub>3</sub>.

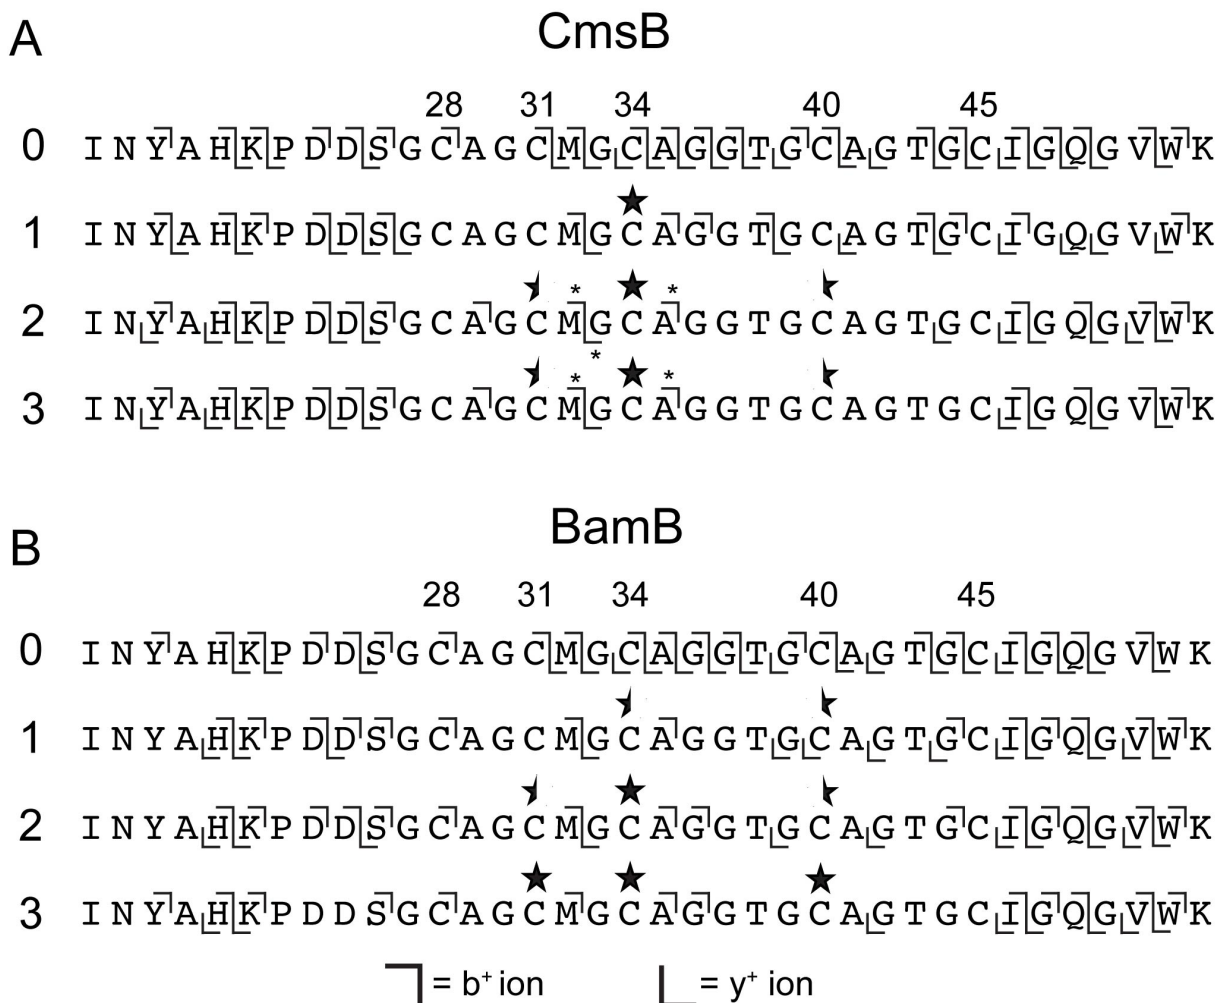

**Figure S3. The order of azole formation on BalhA1-5Tzn by CmsB and BamB. A.** Synthetase reactions containing BalhA1-5Tzn treated with CmsB were quenched by the addition of trypsin and subjected to LC-FTMS/MS. The fragment ions observed for various ring intermediates are denoted by the b<sup>+</sup> and y<sup>+</sup> ion symbols. The leftmost numbers indicate ring state. Across the top, cysteines are numbered based on the sequence of full length BalhA1. Stars signify thiazole locations. A half star signifies that there are ions indicative of a thiazole as well as a free cysteine at that position. Asterisks denote ions containing a mixed population of two peptides. **B.** Same as **A** except using BamB.

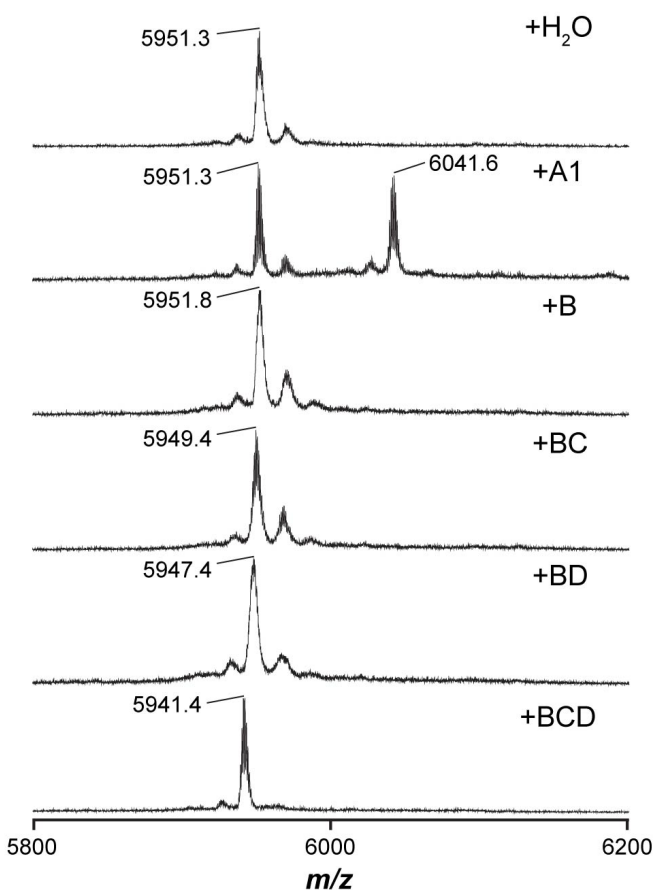

**Figure S4. Minimal requirement for dehydrogenase activity.** BalhA1-5Tzn was treated with various components of the TOMM synthetase. All samples contained supplemental FMN (50  $\mu$ M). The reactions were allowed to react for 16 h at 25 °C prior to analysis by MALDI-TOF-MS. During the preparation of BalhA1-5Tzn, BalhC/D were precipitated using acetonitrile. To demonstrate that all of the BalhC/D had been removed or inactivated, additional BalhA1 was added to a reaction (+A1), and remained unmodified after the reaction ( $m/z$  6041). This suggests that the processing seen for the subsequent reactions was the result of the indicated proteins. The addition of BcerB alone to BalhA1-5Tzn (+B) did not result in any azole formation, evidenced by the lack of mass shift ( $m/z$  5951). Addition of BcerB, in conjunction with BalhC (+BC) or BalhD (+BD), resulted in 1 thiazole or 2 thiazoles as the major species ( $m/z$ 's 5949, 5947 respectively). However, efficient dehydrogenation only occurred when BcerB, BalhC, and BalhD were all present, as evidenced by the loss of 10 Da (5 x 2H,  $m/z$  5941). To remove any unmodified thiazoline heterocycles, all the reactions were hydrolyzed and analyzed again using MALDI-TOF-MS (Figure 8).

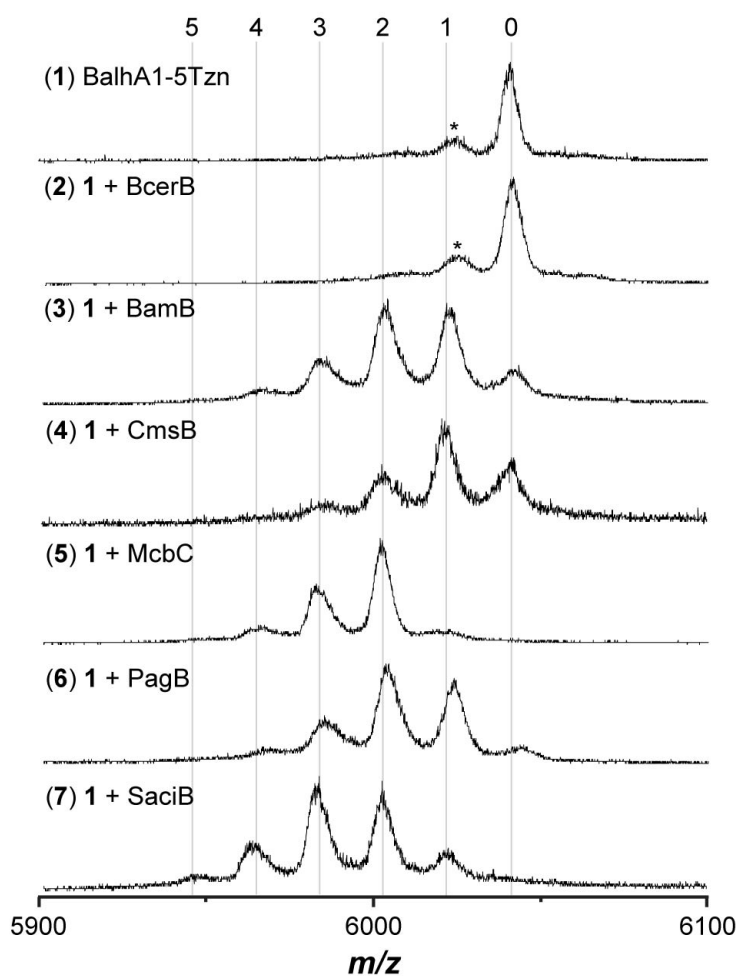

**Figure S5. Noncognate dehydrogenase activity towards BalhA1-5Tzn.** BalhA1-5Tzn and various dehydrogenases were allowed to react for 16 h at 25 °C. To remove any unreacted thiazoline heterocycles, formic acid (10% v/v) was added and allowed to react for at least 1 h prior to MALDI-TOF-MS analysis. The numbers above the spectra indicate the number ofazole heterocycles. The asterisk denotes a laser-induced artifact.



|       |                                                                |      |
|-------|----------------------------------------------------------------|------|
| BalhB | FNNRKSVE-ELEIRTRISFEKLSNLLHFSYGYVNK-----EHNVAPSAGAKYP          | 118  |
| BcerB | LNNRKSVE-ELEIRTRIRFETLSNLLHFSYGYINK-----PHSAAPSAGGKYP          | 117  |
| McbC  | VINISSSHNFSRERLPSGINFCDNKLSIRTIEKLLVNAFSSPDGVSRRPYPSGGALYP     | 139  |
| CmsB  | LAARRSAEPR-TLGRPVELAELATVLRLAYGPR-G-----DGTPRRFVPSGGGLYP       | 170  |
| BamB  | IQNRRSIE-Q-FNGGSTTLAQLSTILQGSYGLIER-----PEGPRRPPIPSGGALYP      | 138  |
| PagB  | IVTRRSIR-T-FSYEPIKLNELSVLLKLSGGVLI----QDEENHSIYHRSFPTAGGLNS    | 138  |
| SaciB | MKRRHSR-A-FRRERINLNKISSLLWYSVGVEI-----ENGIQFRMFPSAGNLAE        | 105  |
|       | : * : : * :                                                    | *:.* |
|       |                                                                |      |
| BalhB | ISIIYIVIFNVE--NL--EQGIYYNKEQDTLELIRKGEYR---DAINNLY-----IDNNH   | 166  |
| BcerB | INIYIAVFNVE--NL--EQGIYYDREQDVLDMIRRGDFR---ESINNLY-----VDNTH    | 165  |
| McbC  | IEVFLCRLSENTENWQAGTNVYHYLPLSQALEPVATCNTQ-----SLYRSLSGGDSER     | 192  |
| CmsB  | LDLHVVARSVV--GL--EPGIHQLDPLEETLVDSGLDRD---GQLARFRRRAAPSLMAPI   | 223  |
| BamB  | LDLYVVSNKVD--SL--EKGLYHFDPYRKGLVHLGEYSEE---DFGRIML-----QEEA    | 185  |
| PagB  | CHVYLISLNVDD--DL--PFGSYYDPLTHELIKIEEYQISQKNEFLDTLVKVLG--NQEW   | 192  |
| SaciB | TEVYLISLYT---DL--EKGVYHYDPVEGSLDVLSNDL-D-EELMLQAIK---N--SLPD   | 153  |
|       | ::: : * :                                                      | :    |
|       |                                                                |      |
| BalhB | IHSSSFIMFHVADLNKTSNKYEDRGYKLIHLDMGHLSQNLVLLSSAQQLGIRAIIFGLYEN  | 230  |
| BcerB | IHSSSFIMFHAANLDQTSSKYADRGYKLIHLDMGHLSQNLVLLSSAQQLGIRAIIFGLYEN  | 229  |
| McbC  | LGKPHFALVYCIIFEKALFKYRYRGYRMALMETGSMYQNAVLVADQIGLKNRVWAGYTDS   | 256  |
| CmsB  | PETAAVTVVITGSFERSRCKYGLRGYRLTLEAGHVGQNALLVATALGLPVLGWVGFVDH    | 287  |
| BamB  | VKDFSFAVIISASFWRSRFKYGHRSYRFIFIEAGHLMQNMILLATAQCIQSRPYGGFIDD   | 249  |
| PagB  | IRTAGLILIIITGDYSKIRLKYGDRGYRYLLEAGHIMQNFYLIASMLNLGVCISIGGFYDD  | 256  |
| SaciB | ITFVPLIILLTSLYWKPMVKTGNRGARFSLIDTGIVIEINFYLVATALGLGISAIIGGFNDD | 217  |
|       | . :. : ** * . : : * : * * : :                                  | * :  |
|       |                                                                |      |
| BalhB | KVNEFLEI-DGENEFVLLSH-VFGGIKYPTPVTMDTKFSDIYYENEIESE-            | 279  |
| BcerB | KVNDFLEL-DGENEFVLLSH-VFGGIKLSTPITMDTKFSDIYYENEETKSEG           | 279  |
| McbC  | YVAKTMNL-DQRTVAPLIVQ-FFGDVNDDK-CLQ-----                        | 287  |
| CmsB  | ELDAV-LGLDGVTOSSLYAI-SFGGADPGARRFADEEASHD-----                 | 326  |
| BamB  | ELMDLIGGHNGVDDAPIYTL-VAGT-----                                 | 273  |
| PagB  | YIAKLIHV-DNTNELVLY-LGGMGKLV-----                               | 281  |
| SaciB | FFNKLIGV-GMEKGEVVIGMLVVGEE-----                                | 242  |
|       | .                                                              |      |

**Figure S6. Multiple sequence alignment of TOMM dehydrogenases.** The dehydrogenases used in this study were aligned using ClustalW2.<sup>1</sup> A known FMN-binding motif is highlighted in yellow, which is lacking in McbC. The invariant Lys-Tyr motif originally identified in a previous study is highlighted in green.<sup>5</sup> Residues mutated in this study are colored red.

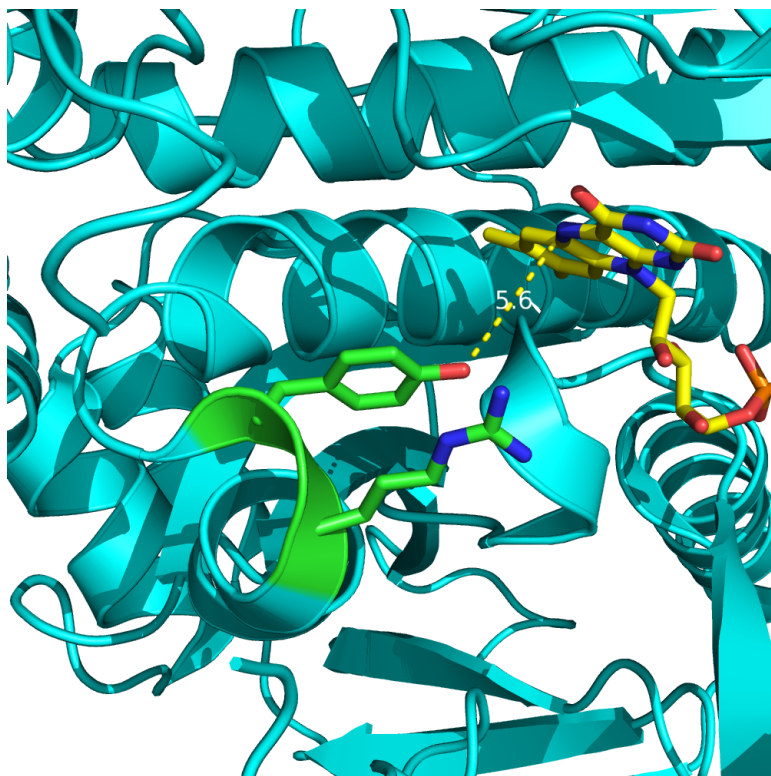

**Figure S7. Non-TOMM dehydrogenase crystal structure highlighting the Lys-Tyr motif.** A ribbon diagram of a putative nitroreductase from *Anabaena variabilis* ATCC 29413 (PDB entry 3EO7). The TOMM dehydrogenase Lys-Tyr motif aligns to 3EO7-R175 and -Y176, whose side chains are shown in stick with green carbons. The FMN cofactor is also shown in stick but with yellow carbons. The closest distance between R175 and Y176 and the FMN cofactor is displayed as a yellow dotted line and was measured to be 5.6 Å.

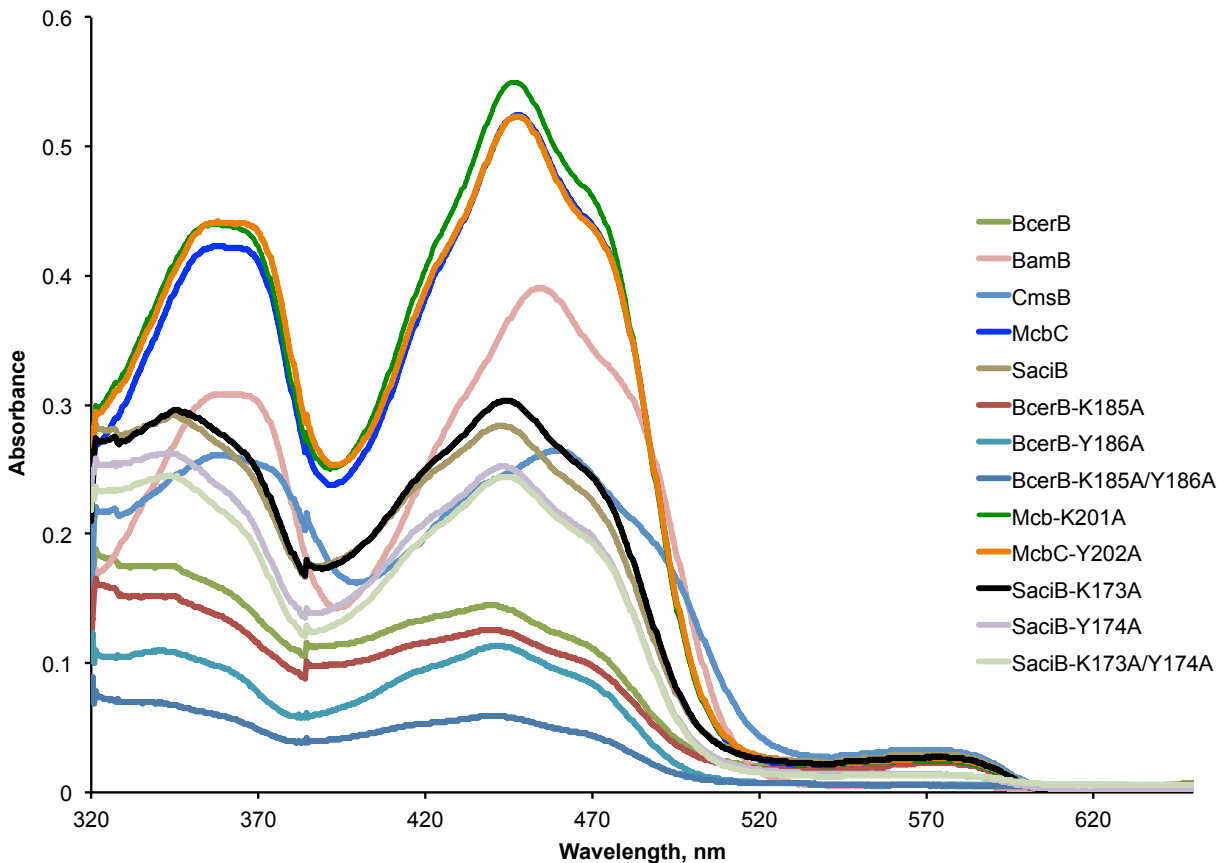

**Figure S8. UV/Vis spectra of TOMM dehydrogenases.** A UV/Vis spectrum for each dehydrogenase used in this study was collected at 50  $\mu\text{M}$  total protein concentration. The intensity of the FMN peaks ( $\lambda_{\text{max}} = 440\text{-}460$  nm) reflects the FMN content after heterologous expression and purification from *E. coli* for a particular dehydrogenase. Based on the molar absorptivity of FMN ( $12,500 \text{ M}^{-1} \text{ cm}^{-1}$ ), a dehydrogenase with 100% loading would have an absorbance of 0.625 at  $\lambda_{\text{max}}$ . The subtle inconsistency in the shape of the spectra at 380 nm is due to a source changeover (deuterium UV lamp to Vis lamp) within the spectrophotometer.

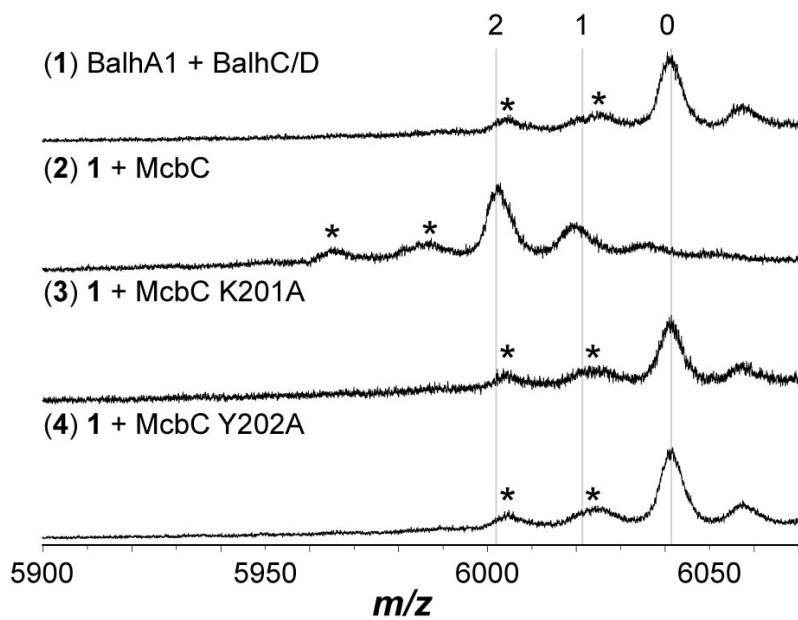

**Figure S9. McbC-K201A and -Y202A lack dehydrogenase activity.** Synthetase reactions containing either wild-type McbC or the indicated mutant proceeded for 16 h at 25°C. Subsequently, all azolines were hydrolyzed by acidification with formic acid prior to MALDI-TOF-MS analysis. Asterisks denote laser-induced artifacts. The numbers above the spectra indicate the number of azoles.

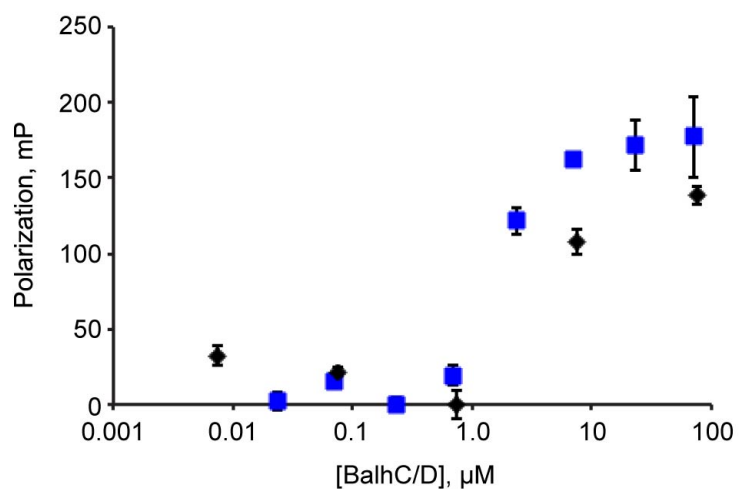

**Figure S10. Binding of BcerB-K185A/Y186A to BalhC/D.** The fluorescence polarization of the FMN cofactor of BcerB-K185A/Y186A ( $1 \mu\text{M}$ ) was measured with varying concentrations of the BalhC/D (black). The binding curve for wild-type BcerB is shown in blue. These data indicate that the Lys-Tyr motif is not integral for synthetase complex formation as evidenced by a highly similar binding curves upon comparison to wild-type BcerB. The point of lowest polarization for BcerB-K185A/Y186A and BcerB were normalized to 0 mP. The error reported for each individual data point corresponds to the standard deviation of three technical replicates.

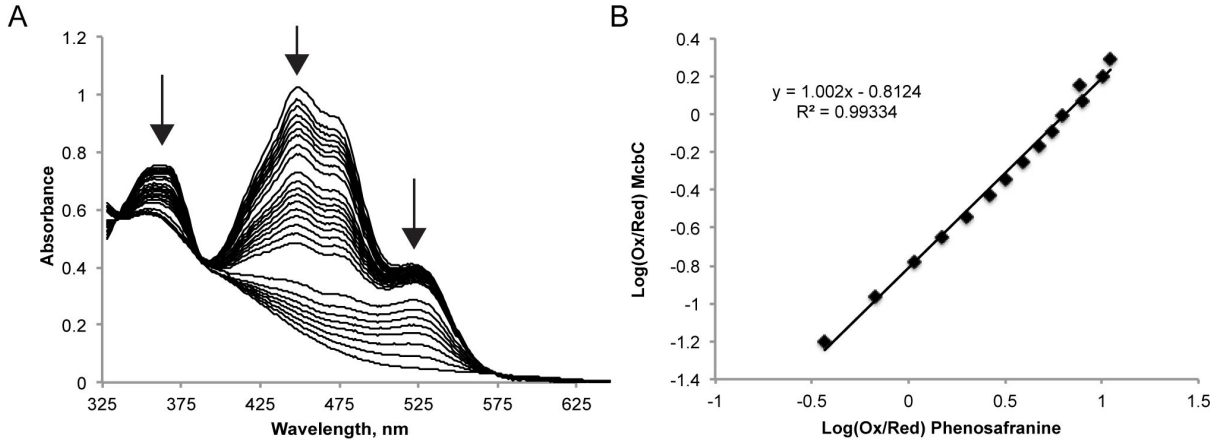

**Figure S11. The reduction potential of McbC as measured by phenosafranine titration. A,** Upon chemical reduction of the FMN cofactor by sodium dithionite, the visible absorbance of McbC was decreased (arrows). The absorbance at 525 nm arises from the presence of the redox indicator dye, phenosafranine, which also loses visible absorbance upon reduction. **B,** The fraction of oxidized (ox) and reduced (red) flavin and phenosafranine were calculated from the spectra shown in panel A. The reduction potential of the dehydrogenase was calculated from the y-intercept by plotting the log(ox/red) BcerB versus the log(ox/red) for phenosafranine.<sup>6</sup> Since the reduction of phenosafranine is a two-electron process, a slope of one indicates that the reduction of the FMN cofactor in McbC involves two electrons.

## References

1. Larkin, M. A., Blackshields, G., Brown, N. P., Chenna, R., McGettigan, P. A., McWilliam, H., Valentin, F., Wallace, I. M., Wilm, A., Lopez, R., Thompson, J. D., Gibson, T. J., and Higgins, D. G. (2007) Clustal W and Clustal X version 2.0, *Bioinformatics* 23, 2947-2948.
2. Crone, W. J. K., Leeper, F. J., and Truman, A. W. (2012) Identification and characterisation of the gene cluster for the anti-MRSA antibiotic bottromycin: expanding the biosynthetic diversity of ribosomal peptides, *Chem. Sci.* 3, 3516-3521.
3. Gomez-Escribano, J. P., Song, L. J., Bibb, M. J., and Challis, G. L. (2012) Posttranslational beta-methylation and macrolactamidation in the biosynthesis of the bottromycin complex of ribosomal peptide antibiotics, *Chem. Sci.* 3, 3522-3525.
4. Huo, L., Rachid, S., Stadler, M., Wenzel, S. C., and Muller, R. (2012) Synthetic biotechnology to study and engineer ribosomal bottromycin biosynthesis, *Chem. Biol.* 19, 1278-1287.
5. Dunbar, K. L., Melby, J. O., and Mitchell, D. A. (2012) YcaO domains use ATP to activate amide backbones during peptide cyclodehydrations, *Nat. Chem. Biol.* 8, 569-575.
6. Massey, V. (1991) A simple method for the determination of redox potentials, In *Flavins and Flavoproteins* (Curti, B., Ronchi, S., and Zanetti, G., Eds.) pp 59-66, Walter de Gruyter, Como, Italy.
